# Supplementary material
Source: ML conference proceedings conference paper supplement (https://openaccess.thecvf.com/content/CVPR2024/html/Doll_DualAD_Disentangling_the_CVPR_2024_paper.html)
Supplement: Supplementary file 1 [file Doll_DualAD_Disentangling_the_CVPR_2024_supplemental.zip]

Archive with 2 entries (2 files):
- dualad_supplementary.mp4
- supplementary.pdf
